# Supplementary material for: Identification of Key Pathways and Establishment of a Seven-Gene Prognostic Signature in Cervical Cancer
Source: Research Square preprint supplement (doi:10.21203/rs.3.rs-390536/v1), 2021-04-05
Supplement: Supplementary file 1 [file e546b5392872b42563ed830b.docx]

**Checklist for original article**

Title of the manuscript: Identification of key pathways and establishment of a seven-gene prognostic signature in cervical cancer

Please check below items as ***ⅴ*** mark before submission of the manuscript.

1. General guideline

- Manuscript contained one original manuscript, checklist, statement of copyright transfer, and introduction for authors and was dispatched via email (Statement of copyright transfer should be dispatched via PDF file)
- Manuscripts should be typewritten on one side of A4 paper only, with a 4-cm margin, be double spaced and bear the title of the article, the name (s) of the contributor (s), the name and address of the institute where the work was done and a shortened title (no more than 50 spaces).
- The text of a research paper should be divided into Introduction, Materials and Methods, Results, Discussion, Acknowledgements, and References.

2. Cover page

- Title, name of authors, affiliation was described in English.
- Corresponding author’s telephone and fax number, and e-mail address, if available, should be provided.

3. Abstract and Keywords

- An Abstract of 150-250 words should be included at the beginning of the paper.
- A list of 4-6 Key words is essential for indexing purposes. These keywords should be typed at the end of the abstract.

4. Main text

- The order of the subtitle was described according to the Instruction to Authors.
- References in the main text were described according to the Instruction to Authors.

5. References

- Every article in REFERENCES were cited in the main text.
- References should be referred to by a name and year chronologically in the text in parentheses (e.g.: Abbott 1991; Barakat et al. 1995; Kelso and Smith 1995) and listed alphabetically at the end of paper.

6. Tables and figures

- Photos were in required format.
- The numbers of tables and figures were described according to the Instruction to Authors.

7. Author’s agreement of originality and statement of copyright transfer

- This is the original article which did not published in any other publication.
